# Supplementary material
Source: PubMed Central journal article supplement (PMC5527298)

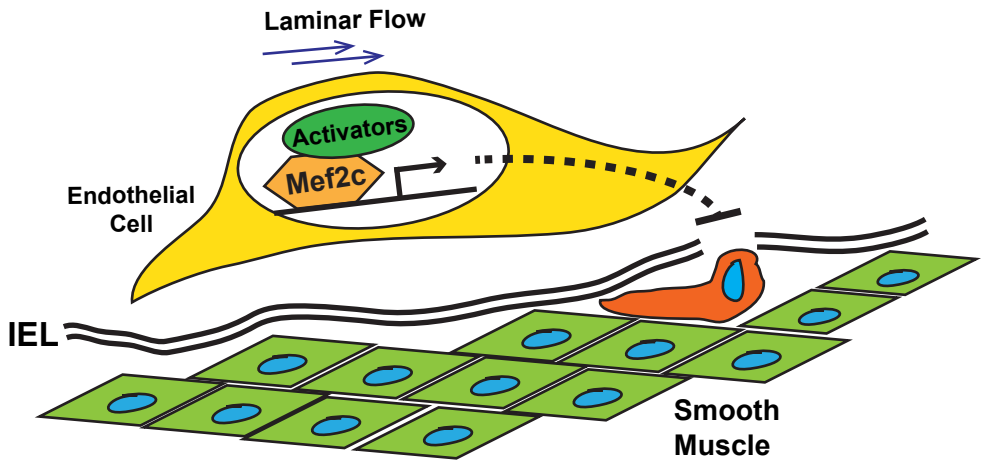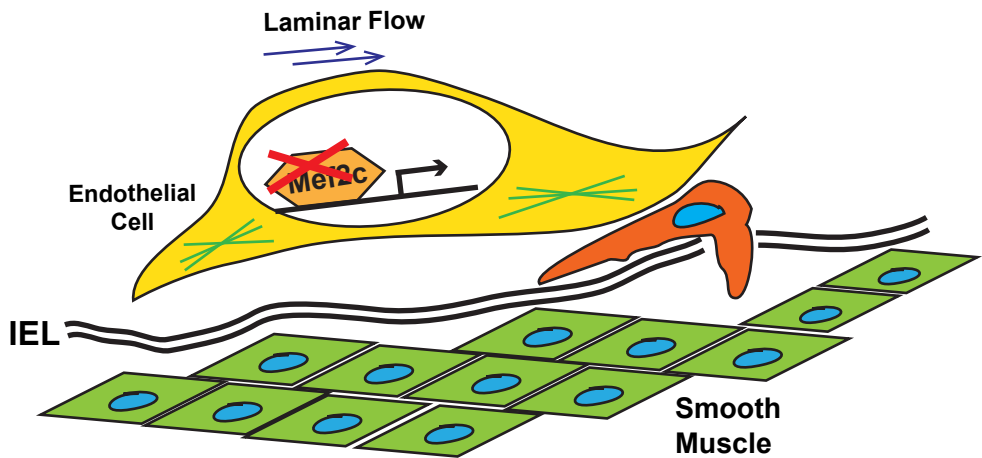

Supplement: NIHMS871871-supplement-Graphic_Abstract.pdf [file NIHMS871871-supplement-Graphic_Abstract.pdf]
